# Supplementary material
Source: ML conference proceedings conference paper supplement (https://openreview.net/forum?id=fIj88Tn3fc)
Supplement: supplementary_material [file attachment]

# Re-Mix: Optimizing Data Mixtures for Large Scale Imitation Learning

Anonymous Author(s)

Affiliation

Address

email

**Abstract:** Increasingly large robotics datasets are being collected to train larger foundation models in robotics. However, despite the fact that data selection has been of utmost importance to scaling in vision and natural language processing (NLP), little work in robotics has questioned what data such models should actually be trained on. In this work we investigate how to weigh different subsets or “domains” of robotics datasets during pre-training to maximize worst-case performance across all possible downstream domains using distributionally robust optimization (DRO). Unlike in NLP, we find that these methods are hard to apply out of the box due to varying action spaces and dynamics across robots. Our method, Re-Mix, employs early stopping and action normalization and discretization to counteract these issues. Through extensive experimentation on both the Bridge and OpenX datasets, we demonstrate that data curation can have an outsized impact on downstream performance. Specifically, domain weights learned by Re-Mix outperform uniform weights by over 40% on average and human-selected weights by over 20% on datasets used to train the RT-X models.

**Keywords:** Data Curation, Data Quality, Robot Imitation Learning

## 1 Introduction

Many breakthroughs in machine learning can be attributed to “Internet-scale” datasets, from the development of vision models like CLIP [1] to recent advancements in transformer-based language modeling powered by the Common Crawl dataset [2]. Seeking to capitalize on this trend, several recent efforts in robotics focus on collecting [3–6] or pooling [7] large scale robotics datasets with the goal of training more performant imitation learning policies. Learning from this data, however, is particularly challenging: robotics datasets are collected with different robots, environments, state spaces, action spaces, and dynamics [8]. Moreover, actions themselves can be sub-optimal. Although the scale of robot data is critical to replicating the success of large vision and language models, a fundamental question remains in robotics: what data should actually be used for training?

While initial vision and language models were trained on highly-curated academic datasets like ImageNet [9], questions surrounding data selection have shaped modern training pipelines that use internet scale data [10–12]. For example, the training of large language models involves numerous stages of data filtering [13], while large vision datasets like LAION [14] assess the quality of each data point using pre-trained models like CLIP [1]. Thus as scaling of robot datasets continues, we can expect robotics data curation to become equally critical. Unfortunately, simple filtering techniques are often inadequate in robotics; we cannot apply n-gram filters, and visual embeddings do not capture the sequential nature of episodic robot data.

Even though aspects of demonstration data such as action quality [15] and visual diversity [3, 4, 16] have been shown to be of paramount importance to downstream performance, approaches for robotics data curation remain limited. In imitation learning, the data selection problem has only been characterized theoretically [17, 18] or in small-scale toy settings [19]. Thus in practice we are left with ad hoc solutions: as an example, the recently released Octo [20] generalist policy was trained on a curated subset of the Open X-Embodiment dataset [OpenX; 7], a large collection of more than 60 individual robot datasets with a total of more than 2M robot trajectories. The authors chose which datasets to include at what sampling

weight based on a subjective notion of “interestingness” [20]. The resulting data mix is aptly dubbed the “magic soup,” owing to its mystical origins. RT-X [7] similarly determines dataset mixture weights based on expert intuition. While the resulting data mixes are shown to work well in practice, their curation requires extensive domain knowledge and manual data inspection. Such ad hoc selection strategies are unlikely to scale to the rapidly growing datasets used to train robot policies [3, 5, 21].

In this work, we ask: how can we *automatically* curate large-scale robotics datasets to maximize performance of generalist imitation learning policies across domains? Though many filtering techniques are not directly applicable to robotics, we can borrow ideas from language modeling that systematically optimize training data mixtures based on the model’s performance [22]. Specifically, we use group distributionally robust optimization [23] to maximize the performance of a policy across all “domains” in a given dataset. In the context of robotics, such “domains” can correspond to different scenes within a single dataset, e.g., different toy kitchens for the Bridge V2 dataset [4], or full robot datasets in the case of multi-dataset mixtures like the OpenX dataset. Unfortunately, naïvely applying such techniques [22] to robotics domains results in poor performance due to the heterogeneity of robotics data in comparison to language. To fix these problems, we propose Re-weighting Robotic Dataset Mixtures with Minimax Optimization (Re-Mix for short). Re-Mix instantiates the data curation problem as a min-max optimization, where a policy *minimizes* its excess behavior cloning loss over a reference model subject to learned domain mixture weights that try to *maximize* it. Intuitively, the excess loss measures how much room the policy has to improve on a given group, and our approach optimizes the data mixture to maximize such improvement potential. Crucially, we carefully control the loss magnitudes between domains via action normalization and discretization, even if the final policies we train are continuous diffusion models [24, 25]. Moreover, we find that careful selection of the reference model is important to prevent overfitting, which can easily skew domain weights.

We empirically evaluate Re-Mix by using it to automatically optimize the training data mixture for the Bridge V2 dataset [4] and the OpenX-based dataset used to train RT-X [7]. We show that policies trained with our data mix improve performance by 40% and 20% respectively over naïve data balancing and human-expert-curated data mixtures in evaluations across WidowX and Franka robot arms. Additionally, we show that weights from Re-Mix can effectively *sub-sample* both datasets, achieving competitive performance using only 25% of the original data, while using uniform or human curated weights significantly reduces performance.

Our contributions are as follows:

- We introduce Re-Mix, which extends Xie et al. [22] for automatically curating large-scale robotics datasets using group distributionally robust optimization.
- We demonstrate Re-Mix’s ability to curate effective training mixes for the Bridge [4] and RT-X [7] data.
- We release curated subsets of the Bridge and RT-X datasets, which can be used for training generalist policies with minimal loss in performance, while significantly reducing the required compute budget.

## 2 Related Work

In congruence with the rise of deep learning in various fields, data selection has become of increasing interest. Here we review the most relevant works, organized by area.

**The Data Problem in Robotics.** Several recent works in robotics have focused on collecting large demonstration datasets for imitation learning in simulation [15, 26, 27] and the real world [3, 7, 28–32] to train large-scale robot policies [6, 20, 33, 34]. Generally, these works along with others that study the influence of data collection on compositional generalization [16, 35, 36] show that aspects of dataset construction such as scene and task diversity have a direct impact on downstream policy generalization. Though several studies focus on *how* data should be collected via specific hardware [37], collection procedures [16, 38, 39], or provide theoretic insights about data collection [17], little work in robotics addresses the post-hoc dataset selection and analysis problem. This is particularly important as the number and diversity of robot datasets are increasing with less clear conclusions about how to train a policy that effectively consumes all the collected data [3, 7, 20]. Baker et al. [40] train a classifier to predict data quality, but require human annotations which are impractical to scale. Perhaps most related are retrieval-based methods that subset datasets [41, 42], but do so based on a priori target task specifications and are thus inapplicable to training generalist policies.

**Data Curation in Computer Vision.** Computer vision datasets were originally hand-crafted and manually labeled [9, 43]. However, tapping into more high quality data has been crucial to increasing performance [1, 44]. Notably, filtering techniques based on metadata-count balancing [45], embeddings [14], optical flow [46], and clustering [47] have shown to greatly improve downstream performance despite filtering out large amounts of data. Taking it to the extreme, coreset selection methods select miniscule subsets of vision datasets using active learning [48, 49], but on small datasets due to computational requirements [50, 51]. Though learning from demonstrations may involve vision, at its core is *action* prediction. Data curation techniques from computer vision can only filter state-action trajectories in an action-agnostic manner – potentially removing useful parts of a dataset.

**Data Curation in Natural Language Processing.** When training on large real-world sources of text, language modeling pipelines employ a number of text-specific preprocessing steps including metadata filtering, language filtering, de-duplication, and toxicity reduction [13]. More advanced methods for data selection consider sub-setting data to maximize downstream performance, as we also do in this work, but use techniques such as k-means clustering over embedded text [52, 53]. While such clustering techniques can potentially be visually informative in robotics as well – similar to curation works in computer vision – they do not provide information about *actions*. Mixture techniques, such as Domain Reweighting with Minimax Optimization (DoReMi) [22] balance text domains using robust optimization and build upon ideas from prioritized training [54–56]. Our work is inspired by DoReMi as such robust optimization approaches can be applied to imitation learning as well. However, directly applying DoReMi to robotics datasets is non-trivial as we show in the next section.

### 3 Re-weighting Robotic Dataset Mixtures with Minimax Optimization

In this section, we first formalize the problem of re-weighting robotics data mixtures for imitation learning. We then discuss our approach which uses distributionally robust optimization for selecting domain weights and sub-setting large robotics datasets.

**Problem Setup.** We consider the general imitation learning problem, where we are given a dataset of demonstrations  $\mathcal{D} = \{\tau_1, \dots, \tau_n\}$  consisting of state-action trajectories  $\tau = (s_1, a_1, \dots, s_{T_i}, a_{T_i})$ . Our goal is to learn a parameterized policy  $\pi_\theta$  that learns a mapping from states to actions  $\pi_\theta: \mathcal{S} \rightarrow \mathcal{A}$ . In practice, this is often done through standard imitation learning algorithms such as behavior cloning (BC) by minimizing the expected negative log-likelihood of the actions under the policy:

$$\mathcal{L}_{\text{BC}}(\pi_\theta, \mathcal{D}) = \mathbb{E}_{(s,a) \sim \mathcal{D}} [-\log \pi_\theta(a|s)] \quad (1)$$

However, datasets often contain more information than just state action pairs. We assume that the overall dataset  $\mathcal{D}$  can be split into  $k$  heterogeneous domains  $\mathcal{D}_1, \dots, \mathcal{D}_k$ . This is a general assumption: while these domains could be larger groups, like different datasets from the Open X-Embodiment dataset [7], they could also be as small as single trajectories. Moreover, each of the  $k$  domains can differ in state space  $\mathcal{S}$ , action space  $\mathcal{A}$ , transition dynamics, or their distributions. In fact when learning large behavior models, such heterogeneity becomes necessary to access more sources of diverse data. In this work, we use the Bridge dataset [4] – with different environments as the domains, and the Open-X-Embodiment dataset [7] – with different robot embodiments as the differing domains.

Our goal is to learn a weighting vector  $\alpha \in \Delta^k$  that specifies a probability distribution over all domains such that any model, when trained on a domain mixture weighted according to  $\alpha$ , attains maximum performance *across all domains*. We note that unlike the data retrieval problem, which aims to curate data *for a particular target task*, our goal is to curate datasets for effective pre-training or co-training without any a priori knowledge of a target task.

**Distributionally Robust Optimization.** When pre-training on large amounts of robot data we want policies to *generalize* to new settings and tasks, not master a specific target task. With that in mind, we want to optimize for a data mixture that results in models that i) can perform as well as possible on each domain, but ii) do not overfit to any one domain at the expense of another. Distributionally robust optimization (DRO) techniques aim to solve the same problem: learn models that minimize the worst-case training loss [23] – BC loss in the case of imitation learning – across domains  $\mathcal{D}_1 \dots \mathcal{D}_k$ . Specifically,

naïvely applying group robust optimization techniques in robotics would result in the following objective:

$$\min_{\theta} \max_{\alpha \in \Delta^k} \sum_{i=1}^k \alpha_i \mathcal{L}_{\text{BC}}(\pi_{\theta}, \mathcal{D}_i). \quad (2)$$

With this objective,  $\alpha$  up-weights domains that have a higher loss value, emphasizing the hardest domains. However, in practice we might not be interested in just fitting the domains with higher losses. For example, a robotics dataset with complex multi-modal rotation movements for bottle-cap unscrewing might always have higher BC loss than simple pick-place datasets. Thus, standard robust optimization techniques could end up ignoring the latter domain. Instead, as in prior work [22, 48, 57] we consider the *difference* in loss between our learned policy  $\pi_{\theta}$  and a reference policy  $\pi_{\text{ref}}$  which is trained to convergence on a data mix that uniformly samples all domains. In Eq. (2) this equates to replacing  $\mathcal{L}_{\text{BC}}$  with  $\mathcal{L}_{\text{BC}}(\pi_{\theta}, \mathcal{D}_i) - \mathcal{L}_{\text{BC}}(\pi_{\text{ref}}, \mathcal{D}_i)$ . We refer to this difference as the *excess loss*, and use it for robust optimization. Like before, this will down-weight domains that the policy fits well, as it can achieve a loss similar to that of the reference model. However, it crucially also down-weights domains which are difficult to fit (i.e. they have a high policy and reference loss) due to the relative nature of the excess loss. This can happen in the presence of sub-optimal actions. Only domains that have a high excess loss, meaning the policy can improve to match the reference, will be up-weighted as  $\alpha$  is chosen to maximize the excess overall loss.

Unfortunately, models learned directly using robust optimization often exhibit worse overall performance [58, 59]. Instead, we can use the learned  $\alpha$  vector for downstream training as in Xie et al. [22]. This gives us a set of reusable weights that can be used to train different policies without the need for robust optimization.

### 3.1 The Challenges of Applying Robust Optimization in Robotics

While Group DRO has been applied in language modeling, robust optimization techniques face unique challenges in robotics which we highlight here. In the next section, we detail how we incorporate the following changes into a distributionally robust optimization pipeline to select domain weights for robotics datasets.

**Unbalanced Losses.** Large robotics datasets are often highly heterogeneous: many are collected across different embodiments, controllers, and frequencies or even different units (e.g., inches vs meters). Even within the same dataset, different scenes or tasks require different types of actions. Consequently, action magnitudes can be vastly different, causing some datasets to have an outsized effect on robust optimization. To demonstrate this, we construct a toy experiment where we compare training a policy with Group DRO [23] when the action distributions match to when they differ. Specifically, we assign Gaussian random actions to half of the trajectories in the Bridge V2 dataset [4] (*random*). On the other half (*bridge*), we use the original actions, either standardized to a Gaussian to match the noise distribution, or re-scaled between -1 and 1 (“Bounds” normalization [24]). We show the learned  $\alpha$  for each scheme in Table 1. While one might expect that  $\alpha$  would correctly assign majority weight to the “bridge” domain since the “noise” domain is impossible for both the policy and reference model to fit, this is actually only true in the “Gaussian” case when the action distributions of both domains are more aligned. When using “Bounds” normalization, the average action magnitude is lower, and thus the losses on the *bridge* domain are dwarfed by the *random* domain. To mitigate this issue, we apply Gaussian normalization to each domain independently when learning from heterogeneous action spaces.

|          | $\alpha_{\text{noise}}$ | $\alpha_{\text{bridge}}$ |
|----------|-------------------------|--------------------------|
| Bounds   | 0.943                   | 0.057                    |
| Gaussian | 0.158                   | 0.842                    |

**Table 1:** Learned  $\alpha$  from toy setting in Section 3.1

**Continuous Losses.** Robust optimization has largely been applied in discrete classification problems with cross-entropy losses, for example in language modeling [57]. Popular policy learning approaches, however, often predict continuous actions and use L1 or L2 objectives [15, 24, 60, 61]. This is problematic for two reasons. First, action distributions can be multi-modal, and expressive continuous policy classes like diffusion [24] only optimize an upper bound on the true loss. Second, robot datasets often have a large number of action outliers, which can heavily sway the value of continuous action losses. Using a continuous loss function would heavily influence loss magnitudes for domains with multi-modal or outlier actions which for the aforementioned reasons is problematic for DRO. To resolve this problem, we discretize each action dimension via binning when using robust optimization.

**Overfitting.** Datasets in language modeling often contain billions of tokens. As a result, methods like Xie et al. [22] do not observe overfitting because of the scale of their training data. On the other hand,

large robot datasets are comparatively small ( $\sim 10$ -100k demonstrations). Moreover, individual datasets in mixtures like the Open X-Embodiment dataset [7] can be as small as 100 demonstrations. In this regime, it is common for particularly high-capacity policies to achieve near-zero training loss for every datapoint [6, 20, 62]. This is problematic when using the excess loss for robust optimization: if the reference model achieves near-zero training loss on every data point within a domain, the excess loss is equivalent to the regular loss (since the reference loss is always  $\simeq 0$ ) and  $\alpha$  no longer reflects the potential for improvement on each domain. To counteract this problem, we employ aggressive early stopping on both the reference model and robust optimization. Specifically, we select the latest checkpoint from the reference model that has not overfit to *any* of the domains  $\mathcal{D}_1, \dots, \mathcal{D}_k$  as measured by the difference in loss values between the training dataset and a held-out validation dataset for the respective domain. We then run robust optimization for the same number of steps. This ensures that the reference model does not overfit to any individual domain and the learned weights  $\alpha$  are informative.

### 3.2 Re-weighting Robotic Dataset Mixtures with Minimax Optimization

Our final approach, Re-Mix, uses Group distributional robustness to determine the weights of policy training data mixture and incorporates the key design considerations from the previous section.

**Stage 1: Action Preprocessing.** Following Section 3.1 we apply Gaussian normalization separately to every domain with different action spaces and dynamics, and then discretize actions via binning.

**Stage 2: Reference Model Training.** Next, we train a discrete reference model  $\pi_{\text{ref}}$  on the uniform mixture of domains  $\mathcal{D}_1, \dots, \mathcal{D}_k$ , where each domain is weighted in proportion to its size. We select the final reference model checkpoint by validation loss per Section 3.1, and use it to estimate the excess loss per domain.

**Stage 3: Group Distributionally Robust Optimization.** We learn the domain weights  $\alpha$  via the following robust optimization with a discrete policy  $\pi_\theta$ :

$$\min_{\theta} \max_{\alpha \in \Delta^k} \sum_{i=1}^k \alpha_i \left[ \frac{1}{|\mathcal{D}_i|} \sum_{(s,a) \in \mathcal{D}_i} (-\log \pi_\theta(a|s) + \log \pi_{\text{ref}}(a|s)) \right] \quad (3)$$

which minimizes the worst case excess BC loss of the learned policy  $-\log \pi_\theta(a|s) + \log \pi_{\text{ref}}(a|s)$  over all possible weightings of the domains  $\alpha \in \Delta^k$ . To update  $\alpha$  we use the GroupDRO optimizer [23], which preforms one step of exponentiated gradient ascent on  $\alpha$  followed by domain-weighted gradient descent on  $\theta$  at each training step. Our resulting values of  $\alpha$  upweight domains that we can still improve on, while downweighting domains that are trivial or impossible to fit. This means that Re-Mix directly filters data based on actions, unlike other techniques in vision and language that solely filter based on embeddings. We optimize Eq. (3) for the same number of steps as the reference model.

**Stage 4: Data Weighting for Policy Training.** After our robust optimization stage over the excess loss, we take the average value of  $\alpha$  over the course of training, which we denote by  $\bar{\alpha}$ . We can then use this value of  $\bar{\alpha}$  to re-weight different domains, or even subset datasets for co-training.

## 4 Experiments

We aim to answer the following questions: (1) Does Re-Mix effectively curate large robot datasets for downstream policy learning? (2) Can we use Re-Mix to heavily sub-sample robot datasets while retaining good performance? (3) Which design decisions matter for effective automatic curation of large robot datasets?

### 4.1 Experimental Setup

**Datasets.** We test Re-Mix curation on two widely-used, large-scale robot datasets: (1) the Bridge V2 Dataset [4], consisting of 50k diverse teleoperated demonstrations of single-arm manipulation tasks with a WidowX 6DoF robot arm, and (2) the datasets from the Open X-Embodiment dataset used to train RT-1-X and RT-2-X models [7], consisting of a total of 350k demonstrations which span disparate embodiments and environments. We partition the Bridge V2 dataset into 32 domains  $\mathcal{D}_1, \dots, \mathcal{D}_{32}$  based on the scenes the data was collected in. For OpenX, we use each of the 11 datasets in the RT-X training set as a domain for our curation experiments. The OpenX data mix is particularly challenging for effective curation due to its heterogeneous data sources. For a detailed list of all datasets and partitions, see Appendix B.



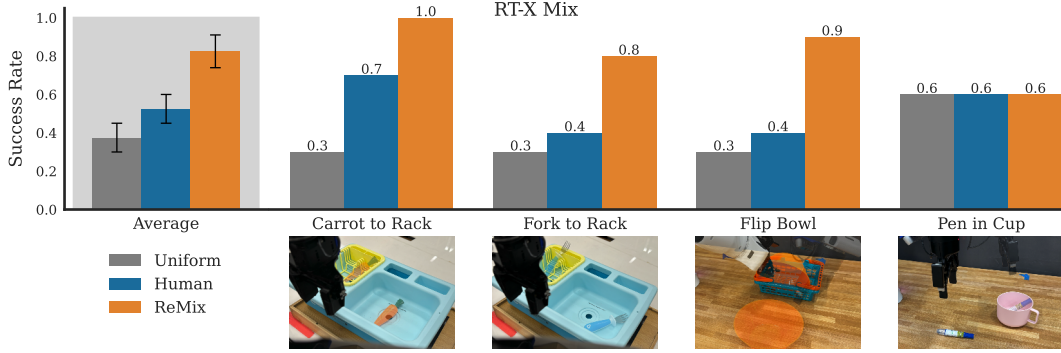

**Figure 1: Results for curating the RT-X training mix.** We test policies trained on different weightings of the RT-X data mixture across two WidowX and two Franka tabletop manipulation tasks. We find that the policy trained on the data mix curated with Re-Mix achieves strongest performance, even outperforming the human-expert-curated data mix from RT-X [7]. Mean  $\pm$  StdErr across 4 tasks, 10 evaluations each.

**Training and Evaluation Details.** We aim to assess the quality of various curated pre-training data mixtures for downstream policy learning. To that end, we co-train generalist goal-conditioned policies on the curated datasets. As we do not have access to the robot setups used to collect the datasets we train on, we construct our own WidowX and Franka robot evaluation setups. Unfortunately, policies trained on *only* the pre-training data failed to zero-shot generalize to our out-of-distribution setups. To address this, we follow prior works [3, 41, 42, 63] and co-train our policies on a small amount of in-domain data (25 demonstrations each for 3 representative tasks), added to the final training mixture at a small weight of 5%. We then evaluate policies on tasks that are out-of-distribution with respect to the co-training data to test generalization. As a result of co-training, all policies achieve non-zero success rate. Importantly, the in-domain dataset is small enough that the quality of the pre-training data mix still has significant impact on the evaluation result, providing a good test bed for data curation approaches. All models are evaluated in the real world with 10 trials per task totaling over 400 real-world trials cumulatively. For all policies we use a ResNet 50 image encoder [64]. For the Re-Mix reference model and Group DRO optimization we use a discrete MLP action head. For all final policies we use the diffusion head from [4, 20, 65] and train all models for 400,000 gradient steps.

**Comparisons.** We compare the quality of Re-Mix’s curated data mixes to a naïve baseline: sampling uniformly from each domain according to the total number of state-action pairs (**Uniform**). For evaluations on the OpenX datasets, we additionally compare to a human-expert-curated data mix, using the hand-crafted weights from RT-X [7]. For Bridge there is no expert-curated data mix — uniform sampling is the norm.

## 4.2 How do Re-Mix weights impact performance?

In Fig. 1 we show results for weighing datasets from the RT-X mix according to different methods. We consider four tasks, two on a WidowX robot and two on a Franka Panda. On the WidowX, the “Carrot to Rack” task tests generalization to an unseen object while “Fork to Rack” tests generalization to unseen initial conditions. On the Panda, the “Pen in Cup” task also tests generalization to unseen initial conditions, while the “Flip Bowl” task tests performance on motions not seen in the pre-training data. Additionally, our Panda robot uses a Robotiq 2F-85 gripper, which was not present in any of the RT-X-datasets. Note that for the RT-X mix, we co-train the same model on both the WidowX and Franka data. As expected, we find that the human-expert-curated dataset weights outperform the naïve uniform sampling baseline by 20%. Qualitatively, we find that all models perform similarly on the “Pen in Cup” task, but the policy trained on the Re-Mix data mixture performs particularly well on “Flip Bowl.” We hypothesize that this is because Re-Mix up-weights the relatively small “Toto” which contains similar pouring motions to the flip bowl task.

Fig. 2 shows results using Re-Mix weights versus uniform weighting over scenes in the Bridge dataset. We find that performance in this setting is similar across both models. We posit that in the presence of the full bridge dataset, selecting weightings is less important as the model is able to fit every scene well.

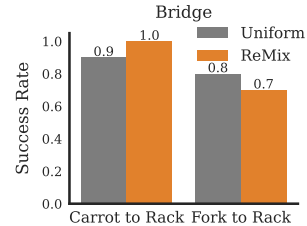

**Figure 2:** On Bridge V2 [4] there is no notable difference between uniform sampling vs. Re-Mix when training on the full dataset.

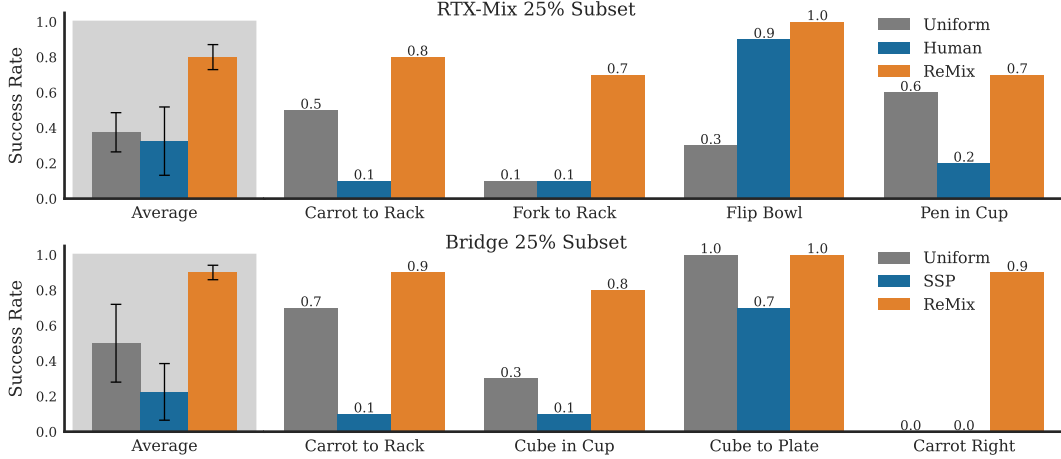

**Figure 3:** Results sub-setting datasets via different strategies until they reach 25% of their original size. We again use 10 evaluations per task, and show the Mean  $\pm$  StdErr.

### 4.3 How well does Re-Mix subset datasets?

Though co-training on diverse data is important for performance [3, 63], doing so is often expensive given that modern robot datasets like the Open X-Embodiment dataset encompass TBs of data. In this section, we evaluate how well Re-Mix can be used to *subset* datasets. The key idea: if Re-Mix weights are proportional to the importance of the data in each domain, we can use them to effectively sub-set the dataset by removing data from domains that Re-Mix assigns low weight. If doing so retains policy performance, we can substantially decrease the required storage and compute for training policies locally.

We subset the base datasets according to Re-Mix and baselines by first computing the target size of the entire data mix *after* sub-setting, in our case 25% of  $|\mathcal{D}|$ . Then, we remove datapoints according to the mixture weights  $\bar{\alpha}$ . If a small dataset is upweighted too much (i.e. if domain  $i$  is 1% of  $|\mathcal{D}|$  but is upweighted to  $\bar{\alpha}_i = 5\%$ ), there might not be enough data to exactly match  $\bar{\alpha}$  from subsetting alone (even if we take all data from the 1% domain, the most it can make up of a 25% subset is 4%). Thus, we sample extra points from the datasets uniformly and at training still weight datasets according to the exact  $\bar{\alpha}$ .

Good subsetting methods ought to retain performance when data is removed. Again, we compare performance of Re-Mix to using naïve uniform sampling for subsetting, and to subsetting based on the human expert weights. For Bridge, where no expert weighting exists, we additionally compare to a vision and language subsetting method called “Self-Supervised Prototypes” (SSP) [66] which runs k-means on image embeddings and discards data closest to each centroid. We average CLIP embeddings across each trajectory to obtain the embeddings for k-means. As subsetting data induces a larger performance gap than simple domain-weighting on Bridge, we design additional tasks to assess performance. “Cube to Plate” and “Cube in Cup” introduce distractors in goal images, while “Carrot to Right” evaluates a motion unseen in co-training.

Our subsetting results can be found in Fig. 3. Overall, we find that subsetting exacerbates the difference between methods, as the weights now directly affect dataset composition. On RTX, Re-Mix retains performance with 25% versus 100% (80% vs 82.5% on average). This is likely because Re-Mix places higher weights on some of the smaller datasets and down-weights the large Kuka dataset from [34]. For example, Re-Mix retains 72% of the Berkeley UR5 Dataset and only 12% of the Kuka dataset, while the human weighting scheme retains only 30% of the UR5 Dataset and 24% of Kuka. On Bridge, Re-Mix also retains performance (90% vs. 100% on “Carrot to Rack”) and out-performs other methods on the new tasks by a large margin. Overall SSP performs poorly, likely since robot trajectories may be out-of-distribution for vision models like CLIP and thus return similar embeddings for all images containing the same robot, regardless of scene differences. Appendix A includes additional results for Bridge with 10% subsetting.

### 4.4 Analyzing Re-Mix Weights

Table 2 shows the weights produced by different methods on the RT-X dataset mix in comparison to the uniform weights corresponding to the original size of the respective dataset (as fraction of the total

| Method  | $\alpha_{UR5}$ | $\alpha_{Cable\ Routing}$ | $\alpha_{Bridge}$ | $\alpha_{Jaco}$ | $\alpha_{Kuka}$ | $\alpha_{RoboTurk}$ | $\alpha_{RT1}$ | $\alpha_{Taco\ Play}$ | $\alpha_{Taco\ Extra}$ | $\alpha_{Toto}$ | $\alpha_{Viola}$ |
|---------|----------------|---------------------------|-------------------|-----------------|-----------------|---------------------|----------------|-----------------------|------------------------|-----------------|------------------|
| Uniform | 1.01%          | 0.43%                     | 22.7%             | 0.81%           | 24.9%           | 1.94%               | 40.9%          | 0.60%                 | 2.46%                  | 3.42%           | 0.80%            |
| Human   | 1.22%          | 1.56%                     | 27.5%             | 1.95%           | 25.1%           | 2.35%               | 26.8%          | 1.46%                 | 5.94%                  | 4.13%           | 1.90%            |
| Re-Mix  | 2.37%          | 0.20%                     | 19.9%             | 0.39%           | 12.1%           | 1.14%               | 42.5%          | 0.63%                 | 3.04%                  | 16.3%           | 1.51%            |

**Table 2:** Dataset mixture weights by different methods on RT-X. We color relative increases of more than 25% from uniform green and color relative decreases of more than 25% red.

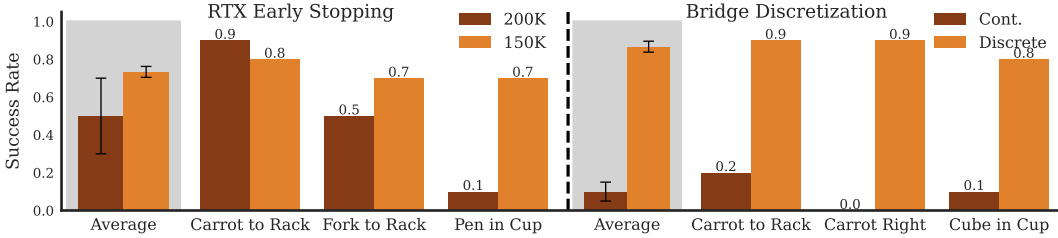

**Figure 4:** Ablations for design choices in Re-Mix. We ablate the effects of **left**: reference model overfitting by selecting a checkpoint once validation loss starts increasing at 150K steps and **right**: using continuous actions for Re-Mix. For ablations, we remove the “Flip Bowl” and “Cube to Plate” tasks as all Re-Mix variants achieved 100% success.

dataset). The human-expert-designed weights largely down-weight RT-1 [6], while up-weighting some of the smaller datasets like Routing [67], and Taco [68]. On the other hand, Re-Mix largely down-weights the Kuka dataset [69]. This dataset was autonomously collected and then filtered by success, making it of potentially lower action quality. Re-Mix also down-weights some smaller domains that are easy to fit; for example, Cable Routing has no gripper actions and Jaco [70] only has three possible actions. Surprisingly, Re-Mix up-weights the Toto dataset [71] by more than 4x. We posit that this is because Toto has a particularly multi-modal action distribution which deviates far from a standard Gaussian even after normalization and thus may be more challenging to fit. See Appendix A for a plot of its action distribution.

#### 4.5 What matters in Re-Mix?

In this section we ablate several design choices used in Re-Mix (see Section 3.1), including action discretization and early stopping. We run all ablations in the 25% subset setting (see Section 4.3), since subsetting further amplifies the effects of the domain weights. In Fig. 4 we first analyze the effects of choosing a reference model checkpoint for Group DRO that is overfit to the training dataset. Empirically, we find that choosing a checkpoint just 50K steps after early stopping decreases performance by over 15% on average, likely because the reference model baseline used to determine the domain weights is less meaningful once it overfits. On the right half of Fig. 4, we show performance on Bridge when using continuous (Cont.) actions in Re-Mix instead of discrete for estimating  $\alpha$ . We find that continuous actions lead to significantly worse performance, as their loss functions fail to fit outliers or multi-modal actions.

## 5 Limitations and Future Work

In this work we present Re-Mix, a method for automatically curating robotics datasets using distributionally robust optimization.

**Evaluation.** While we train on large, diverse robot datasets, the need for real world trials makes it difficult to exhaustively evaluate trained generalist policies on many robot embodiments and setups. While our evaluations capture two widely used robot arms from prior works [4, 7, 20], WidowX and Franka, future work should extend to more embodiments, perhaps via simulated environments [62].

**Abnormal Action Distributions.** We have noticed that our method upweights datasets with abnormal action distributions such as the Toto dataset. While resulting data mixes performed well, such up-weighting is not necessarily desirable. We hope to achieve less sensitivity to such irregularities in future work.

**Computational Cost.** Using our pre-computed weights can significantly reduce the compute required to train generalist policies. However, our approach for computing Re-Mix weights requires training policies on the full data twice. Future work can instead strive to curate datasets “on-the-fly” within one run.

**Scaling Up.** While we have demonstrated improvements on two large datasets, Bridge V2 and RT-X, scaling up to even larger ones such as the Open X dataset [7] (>2M episodes) is an exciting extension.



## References

- [1] A. Radford, J. W. Kim, C. Hallacy, A. Ramesh, G. Goh, S. Agarwal, G. Sastry, A. Askell, P. Mishkin, J. Clark, et al. Learning transferable visual models from natural language supervision. In *International conference on machine learning*, pages 8748–8763. PMLR, 2021.
- [2] A. Conneau, K. Khandelwal, N. Goyal, V. Chaudhary, G. Wenzek, F. Guzmán, E. Grave, M. Ott, L. Zettlemoyer, and V. Stoyanov. Unsupervised cross-lingual representation learning at scale. *arXiv preprint arXiv:1911.02116*, 2019.
- [3] A. Khazatsky, K. Pertsch, S. Nair, A. Balakrishna, S. Dasari, S. Karamcheti, S. Nasiriany, M. K. Srirama, L. Y. Chen, K. Ellis, et al. Droid: A large-scale in-the-wild robot manipulation dataset. *arXiv preprint arXiv:2403.12945*, 2024.
- [4] H. Walke, K. Black, A. Lee, M. J. Kim, M. Du, C. Zheng, T. Zhao, P. Hansen-Estruch, Q. Vuong, A. He, V. Myers, K. Fang, C. Finn, and S. Levine. Bridgedata v2: A dataset for robot learning at scale. In *Conference on Robot Learning (CoRL)*, 2023.
- [5] H.-S. Fang, H. Fang, Z. Tang, J. Liu, J. Wang, H. Zhu, and C. Lu. Rh20t: A robotic dataset for learning diverse skills in one-shot. In *RSS 2023 Workshop on Learning for Task and Motion Planning*, 2023.
- [6] A. Brohan, N. Brown, J. Carbajal, Y. Chebotar, J. Dabis, C. Finn, K. Gopalakrishnan, K. Hausman, A. Herzog, J. Hsu, J. Ibarz, B. Ichter, A. Irpan, T. Jackson, S. Jesmonth, N. Joshi, R. Julian, D. Kalashnikov, Y. Kuang, I. Leal, K.-H. Lee, S. Levine, Y. Lu, U. Malla, D. Manjunath, I. Mordatch, O. Nachum, C. Parada, J. Peralta, E. Perez, K. Pertsch, J. Quiambao, K. Rao, M. Ryoo, G. Salazar, P. Sanketi, K. Sayed, J. Singh, S. Sontakke, A. Stone, C. Tan, H. Tran, V. Vanhoucke, S. Vega, Q. Vuong, F. Xia, T. Xiao, P. Xu, S. Xu, T. Yu, and B. Zitkovich. Rt-1: Robotics transformer for real-world control at scale. In *arXiv preprint arXiv:2212.06817*, 2022.
- [7] Open X-Embodiment Collaboration, A. Padalkar, A. Pooley, A. Jain, A. Bewley, A. Herzog, A. Irpan, A. Khazatsky, A. Rai, A. Singh, A. Brohan, A. Raffin, A. Wahid, B. Burgess-Limerick, B. Kim, B. Schölkopf, B. Ichter, C. Lu, C. Xu, C. Finn, C. Xu, C. Chi, C. Huang, C. Chan, C. Pan, C. Fu, C. Devin, D. Driess, D. Pathak, D. Shah, D. Büchler, D. Kalashnikov, D. Sadigh, E. Johns, F. Ceola, F. Xia, F. Stulp, G. Zhou, G. S. Sukhatme, G. Salhotra, G. Yan, G. Schiavi, H. Su, H.-S. Fang, H. Shi, H. B. Amor, H. I. Christensen, H. Furuta, H. Walke, H. Fang, I. Mordatch, I. Radosavovic, I. Leal, J. Liang, J. Kim, J. Schneider, J. Hsu, J. Bohg, J. Bingham, J. Wu, J. Wu, J. Luo, J. Gu, J. Tan, J. Oh, J. Malik, J. Tompson, J. Yang, J. J. Lim, J. Silvério, J. Han, K. Rao, K. Pertsch, K. Hausman, K. Go, K. Gopalakrishnan, K. Goldberg, K. Byrne, K. Oslund, K. Kawaharazuka, K. Zhang, K. Majd, K. Rana, K. Srinivasan, L. Y. Chen, L. Pinto, L. Tan, L. Ott, L. Lee, M. Tomizuka, M. Du, M. Ahn, M. Zhang, M. Ding, M. K. Srirama, M. Sharma, M. J. Kim, N. Kanazawa, N. Hansen, N. Heess, N. J. Joshi, N. Suenderhauf, N. D. Palo, N. M. M. Shafiullah, O. Mees, O. Kroemer, P. R. Sanketi, P. Wohlhart, P. Xu, P. Sermanet, P. Sundaresan, Q. Vuong, R. Rafailov, R. Tian, R. Doshi, R. Martín-Martín, R. Mendonca, R. Shah, R. Hoque, R. Julian, S. Bustamante, S. Kirmani, S. Levine, S. Moore, S. Bahl, S. Dass, S. Song, S. Xu, S. Haldar, S. Adebola, S. Guist, S. Nasiriany, S. Schaal, S. Welker, S. Tian, S. Dasari, S. Belkhal, T. Osa, T. Harada, T. Matsushima, T. Xiao, T. Yu, T. Ding, T. Davchev, T. Z. Zhao, T. Armstrong, T. Darrell, V. Jain, V. Vanhoucke, W. Zhan, W. Zhou, W. Burgard, X. Chen, X. Wang, X. Zhu, X. Li, Y. Lu, Y. Chebotar, Y. Zhou, Y. Zhu, Y. Xu, Y. Wang, Y. Bisk, Y. Cho, Y. Lee, Y. Cui, Y. hua Wu, Y. Tang, Y. Zhu, Y. Li, Y. Iwasawa, Y. Matsuo, Z. Xu, and Z. J. Cui. Open X-Embodiment: Robotic learning datasets and RT-X models. <https://arxiv.org/abs/2310.08864>, 2023.
- [8] J. H. Yang, D. Sadigh, and C. Finn. Polybot: Training one policy across robots while embracing variability. In *7th Annual Conference on Robot Learning*, 2023. URL <https://openreview.net/forum?id=HEIRj51lcS>.

- [9] J. Deng, W. Dong, R. Socher, L.-J. Li, K. Li, and L. Fei-Fei. Imagenet: A large-scale hierarchical image database. In *2009 IEEE Conference on Computer Vision and Pattern Recognition*, pages 248–255, 2009. doi:10.1109/CVPR.2009.5206848.
- [10] L. Gao, S. Biderman, S. Black, L. Golding, T. Hoppe, C. Foster, J. Phang, H. He, A. Thite, N. Nabeshima, S. Presser, and C. Leahy. The Pile: An 800gb dataset of diverse text for language modeling. *arXiv preprint arXiv:2101.00027*, 2020.
- [11] G. Penedo, H. Kydliček, L. von Werra, and T. Wolf. Fineweb, 2024. URL <https://huggingface.co/datasets/HuggingFaceFW/fineweb>.
- [12] K. Grauman, A. Westbury, E. Byrne, Z. Chavis, A. Furnari, R. Girdhar, J. Hamburger, H. Jiang, M. Liu, X. Liu, et al. Ego4d: Around the world in 3,000 hours of egocentric video. In *Proceedings of the IEEE/CVF Conference on Computer Vision and Pattern Recognition*, pages 18995–19012, 2022.
- [13] A. Albalak, Y. Elazar, S. M. Xie, S. Longpre, N. Lambert, X. Wang, N. Muennighoff, B. Hou, L. Pan, H. Jeong, C. Raffel, S. Chang, T. Hashimoto, and W. Y. Wang. A survey on data selection for language models, 2024.
- [14] C. Schuhmann, R. Beaumont, R. Vencu, C. Gordon, R. Wightman, M. Cherti, T. Coombes, A. Katta, C. Mullis, M. Wortsman, et al. Laion-5b: An open large-scale dataset for training next generation image-text models. *Advances in Neural Information Processing Systems*, 35:25278–25294, 2022.
- [15] A. Mandlekar, D. Xu, J. Wong, S. Nasiriany, C. Wang, R. Kulkarni, L. Fei-Fei, S. Savarese, Y. Zhu, and R. Martín-Martín. What matters in learning from offline human demonstrations for robot manipulation. *arXiv preprint arXiv:2108.03298*, 2021.
- [16] J. Gao, A. Xie, T. Xiao, C. Finn, and D. Sadigh. Efficient data collection for robotic manipulation via compositional generalization, 2024.
- [17] S. Belkhale, Y. Cui, and D. Sadigh. Data quality in imitation learning. *Advances in Neural Information Processing Systems*, 36, 2024.
- [18] S. Ross, G. Gordon, and D. Bagnell. A reduction of imitation learning and structured prediction to no-regret online learning. In *Proceedings of the fourteenth international conference on artificial intelligence and statistics*, pages 627–635. JMLR Workshop and Conference Proceedings, 2011.
- [19] K. Gandhi, S. Karamcheti, M. Liao, and D. Sadigh. Eliciting compatible demonstrations for multi-human imitation learning. In *Conference on Robot Learning*, pages 1981–1991. PMLR, 2023.
- [20] Octo Model Team, D. Ghosh, H. Walke, K. Pertsch, K. Black, O. Mees, S. Dasari, J. Hejna, C. Xu, J. Luo, T. Kreiman, Y. Tan, L. Y. Chen, P. Sanketi, Q. Vuong, T. Xiao, D. Sadigh, C. Finn, and S. Levine. Octo: An open-source generalist robot policy. In *Proceedings of Robotics: Science and Systems*, Delft, Netherlands, 2024.
- [21] S. Nasiriany, A. Maddukuri, L. Zhang, A. Parikh, A. Lo, A. Joshi, A. Mandlekar, and Y. Zhu. Robocasa: Large-scale simulation of everyday tasks for generalist robots. In *Robotics: Science and Systems (RSS)*, 2024.
- [22] S. M. Xie, H. Pham, X. Dong, N. Du, H. Liu, Y. Lu, P. S. Liang, Q. V. Le, T. Ma, and A. W. Yu. Doremi: Optimizing data mixtures speeds up language model pretraining. In A. Oh, T. Naumann, A. Globerson, K. Saenko, M. Hardt, and S. Levine, editors, *Advances in Neural Information Processing Systems*, volume 36, pages 69798–69818. Curran Associates, Inc., 2023. URL [https://proceedings.neurips.cc/paper\\_files/paper/2023/file/dcba6be91359358c2355cd920da3fcbcd-Paper-Conference.pdf](https://proceedings.neurips.cc/paper_files/paper/2023/file/dcba6be91359358c2355cd920da3fcbcd-Paper-Conference.pdf).
- [23] S. Sagawa, P. W. Koh, T. B. Hashimoto, and P. Liang. Distributionally robust neural networks for group shifts: On the importance of regularization for worst-case generalization. *arXiv preprint arXiv:1911.08731*, 2019.

- [24] C. Chi, S. Feng, Y. Du, Z. Xu, E. Cousineau, B. Burchfiel, and S. Song. Diffusion policy: Visuomotor policy learning via action diffusion. In *Proceedings of Robotics: Science and Systems (RSS)*, 2023.
- [25] M. Reuss, M. Li, X. Jia, and R. Lioutikov. Goal conditioned imitation learning using score-based diffusion policies. In *Robotics: Science and Systems*, 2023.
- [26] O. Mees, L. Hermann, E. Rosete-Beas, and W. Burgard. Calvin: A benchmark for language-conditioned policy learning for long-horizon robot manipulation tasks. *IEEE Robotics and Automation Letters (RA-L)*, 7(3):7327–7334, 2022.
- [27] H. Ha, P. Florence, and S. Song. Scaling up and distilling down: Language-guided robot skill acquisition. In *Proceedings of the 2023 Conference on Robot Learning*, 2023.
- [28] E. Jang, A. Irpan, M. Khansari, D. Kappler, F. Ebert, C. Lynch, S. Levine, and C. Finn. Bc-z: Zero-shot task generalization with robotic imitation learning. In *Conference on Robot Learning*, pages 991–1002. PMLR, 2022.
- [29] S. Dasari, F. Ebert, S. Tian, S. Nair, B. Bucher, K. Schmeckpeper, S. Singh, S. Levine, and C. Finn. Robonet: Large-scale multi-robot learning. *arXiv preprint arXiv:1910.11215*, 2019.
- [30] P. Sharma, L. Mohan, L. Pinto, and A. Gupta. Multiple interactions made easy (mime): Large scale demonstrations data for imitation. In *Conference on robot learning*, pages 906–915. PMLR, 2018.
- [31] A. Mandlekar, Y. Zhu, A. Garg, J. Booher, M. Spero, A. Tung, J. Gao, J. Emmons, A. Gupta, E. Orbay, et al. Roboturk: A crowdsourcing platform for robotic skill learning through imitation. In *Conference on Robot Learning*, pages 879–893. PMLR, 2018.
- [32] L. Pinto and A. Gupta. Supersizing self-supervision: Learning to grasp from 50k tries and 700 robot hours. In *2016 IEEE international conference on robotics and automation (ICRA)*, pages 3406–3413. IEEE, 2016.
- [33] B. Zitkovich, T. Yu, S. Xu, P. Xu, T. Xiao, F. Xia, J. Wu, P. Wohlhart, S. Welker, A. Wahid, et al. Rt-2: Vision-language-action models transfer web knowledge to robotic control. In *Conference on Robot Learning*, pages 2165–2183. PMLR, 2023.
- [34] S. Levine, P. Pastor, A. Krizhevsky, J. Ibarz, and D. Quillen. Learning hand-eye coordination for robotic grasping with deep learning and large-scale data collection. *The International journal of robotics research*, 37(4-5):421–436, 2018.
- [35] K. Burns, Z. Witzel, J. I. Hamid, T. Yu, C. Finn, and K. Hausman. What makes pre-trained visual representations successful for robust manipulation? *arXiv preprint arXiv:2312.12444*, 2023.
- [36] A. Xie, L. Lee, T. Xiao, and C. Finn. Decomposing the generalization gap in imitation learning for visual robotic manipulation. *arXiv preprint arXiv:2307.03659*, 2023.
- [37] S. Young, D. Gandhi, S. Tulsiani, A. Gupta, P. Abbeel, and L. Pinto. Visual imitation made easy. In J. Kober, F. Ramos, and C. Tomlin, editors, *Proceedings of the 2020 Conference on Robot Learning*, volume 155 of *Proceedings of Machine Learning Research*, pages 1992–2005. PMLR, 16–18 Nov 2021. URL <https://proceedings.mlr.press/v155/young21a.html>.
- [38] S. Belkhale, Y. Cui, and D. Sadigh. Hydra: Hybrid robot actions for imitation learning. In *Conference on Robot Learning*, pages 2113–2133. PMLR, 2023.
- [39] M. Laskey, J. Lee, R. Fox, A. Dragan, and K. Goldberg. Dart: Noise injection for robust imitation learning. In *Conference on robot learning*, pages 143–156. PMLR, 2017.
- [40] B. Baker, I. Akkaya, P. Zhokov, J. Huizinga, J. Tang, A. Ecoffet, B. Houghton, R. Sampedro, and J. Clune. Video pretraining (vpt): Learning to act by watching unlabeled online videos. *Advances in Neural Information Processing Systems*, 35:24639–24654, 2022.

- [41] M. Du, S. Nair, D. Sadigh, and C. Finn. Behavior retrieval: Few-shot imitation learning by querying unlabeled datasets. *arXiv preprint arXiv:2304.08742*, 2023.
- [42] S. Nasiriany, T. Gao, A. Mandlekar, and Y. Zhu. Learning and retrieval from prior data for skill-based imitation learning. In *Conference on Robot Learning (CoRL)*, 2022.
- [43] A. Krizhevsky, G. Hinton, et al. Learning multiple layers of features from tiny images. 2009.
- [44] M. Oquab, T. Darcet, T. Moutakanni, H. Vo, M. Szafraniec, V. Khalidov, P. Fernandez, D. Haziza, F. Massa, A. El-Nouby, et al. Dinov2: Learning robust visual features without supervision. *arXiv preprint arXiv:2304.07193*, 2023.
- [45] H. Xu, S. Xie, X. Tan, P.-Y. Huang, R. Howes, V. Sharma, S.-W. Li, G. Ghosh, L. Zettlemoyer, and C. Feichtenhofer. Demystifying CLIP data. In *The Twelfth International Conference on Learning Representations*, 2024. URL <https://openreview.net/forum?id=5BCFlnfE1g>.
- [46] A. Blattmann, T. Dockhorn, S. Kulal, D. Mendelevitch, M. Kilian, D. Lorenz, Y. Levi, Z. English, V. Voleti, A. Letts, et al. Stable video diffusion: Scaling latent video diffusion models to large datasets. *arXiv preprint arXiv:2311.15127*, 2023.
- [47] H. V. Vo, V. Khalidov, T. Darcet, T. Moutakanni, N. Smetanin, M. Szafraniec, H. Touvron, C. Couprie, M. Oquab, A. Joulin, et al. Automatic data curation for self-supervised learning: A clustering-based approach. *arXiv preprint arXiv:2405.15613*, 2024.
- [48] K. Chitta, J. M. Álvarez, E. Haussmann, and C. Farabet. Training data subset search with ensemble active learning. *IEEE Transactions on Intelligent Transportation Systems*, 23(9):14741–14752, 2021.
- [49] O. Sener and S. Savarese. Active learning for convolutional neural networks: A core-set approach. *arXiv preprint arXiv:1708.00489*, 2017.
- [50] B. Mirzasoleiman, J. Bilmes, and J. Leskovec. Coresets for data-efficient training of machine learning models. In *International Conference on Machine Learning*, pages 6950–6960. PMLR, 2020.
- [51] V. Birodkar, H. Mobahi, and S. Bengio. Semantic redundancies in image-classification datasets: The 10% you don’t need. *arXiv preprint arXiv:1901.11409*, 2019.
- [52] K. Tirumala, D. Simig, A. Aghajanyan, and A. Morcos. D4: Improving llm pre-training via document de-duplication and diversification. In A. Oh, T. Naumann, A. Globerson, K. Saenko, M. Hardt, and S. Levine, editors, *Advances in Neural Information Processing Systems*, volume 36, pages 53983–53995. Curran Associates, Inc., 2023. URL [https://proceedings.neurips.cc/paper\\_files/paper/2023/file/a8f8cbd7f7a5fb2c837e578c75e5b615-Paper-Datasets\\_and\\_Benchmarks.pdf](https://proceedings.neurips.cc/paper_files/paper/2023/file/a8f8cbd7f7a5fb2c837e578c75e5b615-Paper-Datasets_and_Benchmarks.pdf).
- [53] A. Abbas, K. Tirumala, D. Simig, S. Ganguli, and A. S. Morcos. Semdedup: Data-efficient learning at web-scale through semantic deduplication, 2023.
- [54] S. Mindermann, J. M. Brauner, M. T. Razzak, M. Sharma, A. Kirsch, W. Xu, B. Höltingen, A. N. Gomez, A. Morisot, S. Farquhar, and Y. Gal. Prioritized training on points that are learnable, worth learning, and not yet learnt. In K. Chaudhuri, S. Jegelka, L. Song, C. Szepesvari, G. Niu, and S. Sabato, editors, *Proceedings of the 39th International Conference on Machine Learning*, volume 162 of *Proceedings of Machine Learning Research*, pages 15630–15649. PMLR, 17–23 Jul 2022. URL <https://proceedings.mlr.press/v162/mindermann22a.html>.
- [55] A. H. Jiang, D. L.-K. Wong, G. Zhou, D. G. Andersen, J. Dean, G. R. Ganger, G. Joshi, M. Kaminsky, M. Kozuch, Z. C. Lipton, et al. Accelerating deep learning by focusing on the biggest losers. *arXiv preprint arXiv:1910.00762*, 2019.
- [56] M. Paul, S. Ganguli, and G. K. Dziugaite. Deep learning on a data diet: Finding important examples early in training. *Advances in Neural Information Processing Systems*, 34:20596–20607, 2021.

- [57] Y. Oren, S. Sagawa, T. B. Hashimoto, and P. Liang. Distributionally robust language modeling. In *Proceedings of the 2019 Conference on Empirical Methods in Natural Language Processing and the 9th International Joint Conference on Natural Language Processing (EMNLP-IJCNLP)*, pages 4227–4237, 2019.
- [58] H. Zhang, Y. Yu, J. Jiao, E. Xing, L. El Ghaoui, and M. Jordan. Theoretically principled trade-off between robustness and accuracy. In *International conference on machine learning*, pages 7472–7482. PMLR, 2019.
- [59] D. Tsipras, S. Santurkar, L. Engstrom, A. Turner, and A. Madry. Robustness may be at odds with accuracy. *arXiv preprint arXiv:1805.12152*, 2018.
- [60] T. Z. Zhao, V. Kumar, S. Levine, and C. Finn. Learning fine-grained bimanual manipulation with low-cost hardware. *arXiv preprint arXiv:2304.13705*, 2023.
- [61] F. Ebert, Y. Yang, K. Schmeckpeper, B. Bucher, G. Georgakis, K. Daniilidis, C. Finn, and S. Levine. Bridge data: Boosting generalization of robotic skills with cross-domain datasets. *arXiv preprint arXiv:2109.13396*, 2021.
- [62] X. Li, K. Hsu, J. Gu, K. Pertsch, O. Mees, H. R. Walke, C. Fu, I. Lunawat, I. Sieh, S. Kirmani, S. Levine, J. Wu, C. Finn, H. Su, Q. Vuong, and T. Xiao. Evaluating real-world robot manipulation policies in simulation. *arXiv preprint arXiv:2405.05941*, 2024.
- [63] Z. Fu, T. Z. Zhao, and C. Finn. Mobile aloha: Learning bimanual mobile manipulation with low-cost whole-body teleoperation. In *arXiv*, 2024.
- [64] K. He, X. Zhang, S. Ren, and J. Sun. Deep residual learning for image recognition. In *Proceedings of the IEEE Conference on Computer Vision and Pattern Recognition (CVPR)*, June 2016.
- [65] P. Hansen-Estruch, I. Kostrikov, M. Janner, J. G. Kuba, and S. Levine. Idql: Implicit q-learning as an actor-critic method with diffusion policies, 2023.
- [66] B. Sorscher, R. Geirhos, S. Shekhar, S. Ganguli, and A. Morcos. Beyond neural scaling laws: beating power law scaling via data pruning. In S. Koyejo, S. Mohamed, A. Agarwal, D. Belgrave, K. Cho, and A. Oh, editors, *Advances in Neural Information Processing Systems*, volume 35, pages 19523–19536. Curran Associates, Inc., 2022. URL [https://proceedings.neurips.cc/paper\\_files/paper/2022/file/7b75da9b61eda40fa35453ee5d077df6-Paper-Conference.pdf](https://proceedings.neurips.cc/paper_files/paper/2022/file/7b75da9b61eda40fa35453ee5d077df6-Paper-Conference.pdf).
- [67] J. Luo, C. Xu, X. Geng, G. Feng, K. Fang, L. Tan, S. Schaal, and S. Levine. Multi-stage cable routing through hierarchical imitation learning. *arXiv pre-print*, 2023. URL <https://arxiv.org/abs/2307.08927>.
- [68] E. Rosete-Beas, O. Mees, G. Kalweit, J. Boedecker, and W. Burgard. Latent plans for task agnostic offline reinforcement learning. In *Proceedings of the 6th Conference on Robot Learning (CoRL)*, 2022.
- [69] D. Kalashnikov, A. Irpan, P. Pastor, J. Ibarz, A. Herzog, E. Jang, D. Quillen, E. Holly, M. Kalakrishnan, V. Vanhoucke, et al. Scalable deep reinforcement learning for vision-based robotic manipulation. In *Conference on robot learning*, pages 651–673. PMLR, 2018.
- [70] S. Dass, J. Yapeter, J. Zhang, J. Zhang, K. Pertsch, S. Nikolaidis, and J. J. Lim. Clvr jaco play dataset, 2023. URL [https://github.com/clvr-ai/clvr\\_jaco\\_play\\_dataset](https://github.com/clvr-ai/clvr_jaco_play_dataset).
- [71] G. Zhou, V. Dean, M. K. Srirama, A. Rajeswaran, J. Pari, K. Hatch, A. Jain, T. Yu, P. Abbeel, L. Pinto, et al. Train offline, test online: A real robot learning benchmark. In *2023 IEEE International Conference on Robotics and Automation (ICRA)*, pages 9197–9203. IEEE, 2023.
- [72] TensorFlow Datasets, a collection of ready-to-use datasets. <https://www.tensorflow.org/datasets>.



- 558 [73] J. Pari, N. M. Shafiullah, S. P. Arunachalam, and L. Pinto. The surprising effectiveness of representa-  
559 tion learning for visual imitation, 2021.
- 560 [74] J. Ho, A. Jain, and P. Abbeel. Denoising diffusion probabilistic models. *Advances in neural*  
561 *information processing systems*, 33:6840–6851, 2020.

## 562 A Additional Results

563 Here we include results for 10% subsetting of the bridge dataset as described in Section 4.3. In the  
 564 supplemental material we include videos of rollouts from our experiments.

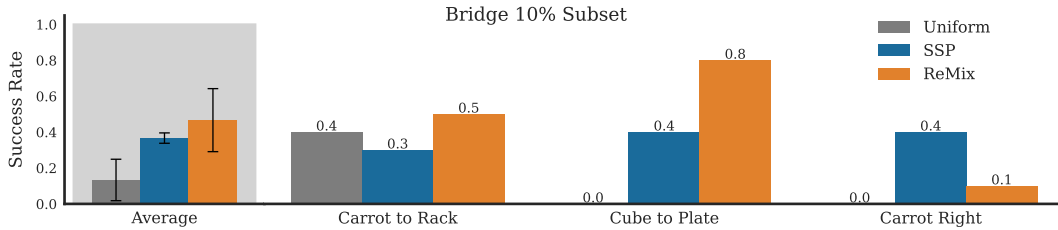

**Figure 5:** Bridge 10% subsetting.

565 Below we can see the difference in distribution between the BridgeV2 dataset [4] and the Toto dataset  
 566 [71] in log scale. The Bridge action distribution is far more normal and symmetric than the ToTo action  
 567 distribution. The Toto distribution is heavily multi-modal and skew.

## 568 B Dataset Details

### 569 B.1 OpenX RTX Subset

570 We use a subset of the OpenX Embodiment dataset similar to that used to train the RT-X models [7]. First, we  
 571 use the RLDS dataset modification repository ([https://github.com/kpertsch/rlds\\_dataset\\_mod](https://github.com/kpertsch/rlds_dataset_mod))  
 572 used by Octo Model Team et al. [20] to preprocess the raw datasets downloaded from Tensor Flow  
 573 Datasets [72]. Specifically, we resize all images to  $256 \times 256$ , and filter the Kuka dataset [69] by an  
 574 included success key. Note that this does warp images. We use the updated version of the Bridge dataset,  
 575 available at [https://rail.eecs.berkeley.edu/datasets/bridge\\_release/data/tfds/](https://rail.eecs.berkeley.edu/datasets/bridge_release/data/tfds/). The  
 576 specific composition of the dataset is listed in Table 2. Note that we only train on the primary third-person  
 577 camera in each dataset. For this reason, we omit the NYU Reacher-grabber dataset [73] which *only* includes  
 578 wrist cameras. We align all action spaces by converting them to delta cartesian and delta euler angle and  
 579 binarize all gripper actions.

### 580 B.2 Bridge V2 Dataset

581 For experiments on bridge-only, we split the bridge dataset into 32 domains. First, we re-downloaded  
 582 the raw bridge dataset and converted it to RLDS using the DLimp convertor (<https://github.com/kvablack/dlimp/>). We then partitioned the bridge dataset by domain using the file path metadata field  
 583 that lists which setting demonstrations were collected in e.g. “toy-kitchen 1” or “toy-sink-3”. We then  
 584 manually group the domains into 32 categories. We omitted data that was collected by a scripted policy, as  
 585 it did not contain the scene information in the filepath metadata. This means we ended up with around  
 586 45,000 training trajectories, instead of the 60K used in the full bridge dataset. In Table 3 we list the  
 587 natural weights of each of these domains and the learned weights by Re-Mix. We can see that Re-Mix  
 588 down-weights some of the largest domains and places their weight on smaller domains.

### 590 B.3 Co-Training Datasets.

591 Below we describe our co-training data and evaluation procedure for the real-world tasks on the WidowX  
 592 250 and Franka Panda robots.

593 **WidowX Tasks** We evaluate on a 6-DoF WidowX 250 robot on several new pick place tasks in a toy  
 594 kitchen setting. Our setup is similar to Bridge V2 [4] with a fixed side camera and a blocking controller.  
 595 Following Walke et al. [4] we use a blocking controller during evaluation. We collect teleoperated  
 596 demonstrations using an Oculus Quest Headset for motion tracking and co-train on 25 demonstrations for  
 597 each of the three tasks “Move Cube out of Sink”, “Move Cup into Sink”, and “Move Fork from Sink to  
 598 Rack.”

| Domain                                                                       | Uniform Weight | ReMix Weight |
|------------------------------------------------------------------------------|----------------|--------------|
| 0 toykitchen2                                                                | 0.18728751     | 0.0961817    |
| 1 datacol2_tabletop_dark_wood                                                | 0.094527       | 0.04846529   |
| 2 toykitchen1                                                                | 0.069307       | 0.07683      |
| 3 toykitchen6                                                                | 0.06940527     | 0.0573625    |
| 4 datacol2_toykitchen7                                                       | 0.07133783     | 0.06905      |
| 5 datacol2_toykitchen2                                                       | 0.0432927      | 0.03651583   |
| 6 toykitchen7                                                                | 0.032803       | 0.03538789   |
| 7 datacol2_folding_table                                                     | 0.038522       | 0.0809778049 |
| 8 datacol1_toykitchen6                                                       | 0.03606622     | 0.037404168  |
| 9 datacol2_robot_desk                                                        | 0.025810027    | 0.034152     |
| 10 datacol2_toykitchen6                                                      | 0.02394393     | 0.02740302   |
| 11 deeptthought_folding_table                                                | 0.0272809      | 0.013906823  |
| 12 datacol2_laundry_machine laundry_machine                                  | 0.02582954     | 0.0396389    |
| 13 datacol2_toykitchen5, toykitchen5                                         | 0.0337366      | 0.049943     |
| 14 deeptthought_toykitchen2                                                  | 0.0253313      | 0.013434348  |
| 15 deeptthought_robot_desk                                                   | 0.01978364     | 0.032410502  |
| 16 tabletop_dark_wood                                                        | 0.0219985      | 0.024691     |
| 17 datacol2_toysink2 toysink2_bww                                            | 0.0225748      | 0.0198516    |
| 18 toykitchen2_room8052                                                      | 0.01083554     | 0.0295857    |
| 19 deeptthought_toykitchen1, datacol1_toykitchen1                            | 0.01868        | 0.04047      |
| 20 datacol2_foldtable_tray, minsky_foldtable_tray, datacol2_toykitchen7_tray | 0.037856699    | 0.0484       |
| 21 toysink3_bww, toysink3                                                    | 0.01235829     | 0.014877     |
| 22 datacol2_toykitchen1                                                      | 0.01155453     | 0.02194      |
| 23 toysink1_room8052 toysink1                                                | 0.00979455     | 0.01831014   |
| 24 tool_chest                                                                | 0.00471524     | 0.00878      |
| 25 toysink5                                                                  | 0.00405418     | 2.78E-05     |
| 26 whiteboard                                                                | 0.006774       | 0.0129337    |
| 27 toykitchen4                                                               | 0.00371938     | 0.00537445   |
| 28 toysink4                                                                  | 0.00289793     | 1.80E-05     |
| 29 toykitchen3                                                               | 0.00124406     | 2.72E-05     |
| 30 realkitchen1_dishwasher                                                   | 0.00202648     | 0.000541     |
| 31 tabletop_light_wood, tabletop_white, realkitchen1_counter                 | 0.004647549    | 0.005079152  |

**Table 3:** Learned weights by Re-Mix on the Bridge V2 dataset.

During evaluation, we examine generalization on various axes. The “Carrot to Rack” task tests generalization to picking up a new type of target object, “Cube to Plate” and “Cube to Cup” test generalization to new containers, and “Carrot to Right” tests generalization to both a new target object and a new motion. For each of these tasks, we first take a goal image and then evaluate our policies with fixed object locations for up to 100 seconds, stopping early if the robot or objects reach unrecoverable states. For “Carrot to Rack” we do five trials with the carrot facing down and five trials with it facing upwards. For “Fork to Rack” we use an unseen initial position to the right side of the sink and rotate the fork left 45 degrees for five episodes and to the right 45 degrees for the other five.

#### B.4 Franka Tasks

We evaluate on a Franka Panda robot on several pick place tasks on a tabletop. We use a fixed over the shoulder camera We co-train on 25 teleoperated demonstrations for each of the tasks “Pen into Cup,” where we put a pen into a cup from 5 different start locations, and “Flip Bowl,” where a bowl is flipped into a drying rack. For the “Pen into Cup” task we use a different pen than in co-training. However, because our franka embodiment with the Robotiq 2F-85 is not found in our pre-training datasets, we evaluate the same tasks as we co-trained on. We evaluate each start location of the pen twice from a new set of predefined positions. As in the WidowX evaluations, we take a goal image for each task and evaluate for up to 100 seconds using a 10Hz controller without blocking control.

|                  | RTX              | Bridge           |
|------------------|------------------|------------------|
| Batch Size       | 512              | 384              |
| Action Chunk     | 4                | 2                |
| Image Resolution | $224 \times 224$ | $224 \times 288$ |

**Table 4:** Hyperparameters

## 617 C Training Details

618 **Architecture.** We borrow our architecture from [4] with a few minor changes. Our policies takes as  
619 input a history of two consecutive frames and a single goal image and output a sequence of actions via  
620 DDPM [74].

621 First, we preprocess all images to fit between -1 and 1. Then, we channel-wise concatenate both the goal  
622 image and a grid containing the position of each pixel in  $(x,y)$  space also normalized between -1 and 1.  
623 Images are then fed to a ResNet 50 encoder, which employs global average pooling on the output to obtain  
624 a 512 dimension representation for each image. Both image representations are then concatenated and fed  
625 to a diffusion action prediction head.

626 **Hyperparameters.** We use a cosine decay learning rate schedule with an initial learning rate of 0.0002.  
627 We train all models for 400K steps and evaluate the final checkpoint, except for Bridge 10% subsetting,  
628 which we found to perform better after 200K steps. More detailed hyperparameters are found in Table 4.  
629 Note that there are some differences between bridge and RTX which were made for computational reasons  
630 – we iterated faster on the bridge dataset before scaling to RTX. We also did maintained aspect ratio for  
631 bridge, hence the different image input size, but did not for RTX follow Octo Model Team et al. [20]. We  
632 apply data augmentation to all images consistently across the time horizon and goal image (meaning that  
633 the goal image and all past images of each example have the same augmentation applied). We use random  
634 resize cropping, brightness, contrast, and hue randomization. For k-means in SSP for Bridge we set  $k = 32$ ,  
635 equal to the number of domains used for Re-Mix.

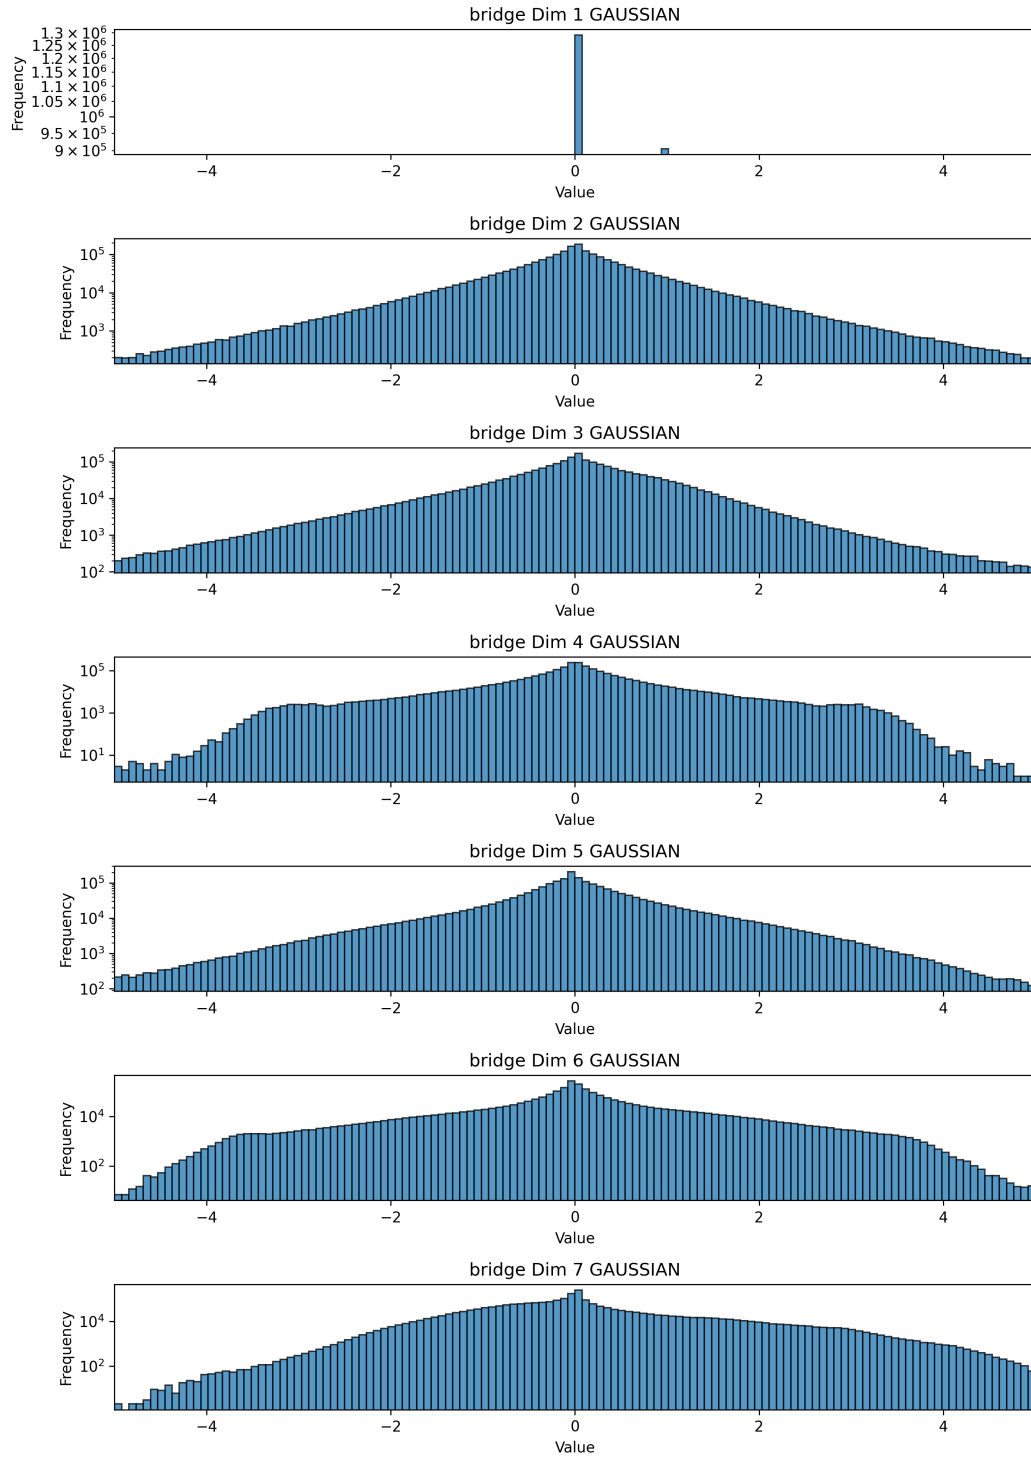

**Figure 6:** Action distributions for Bridge.



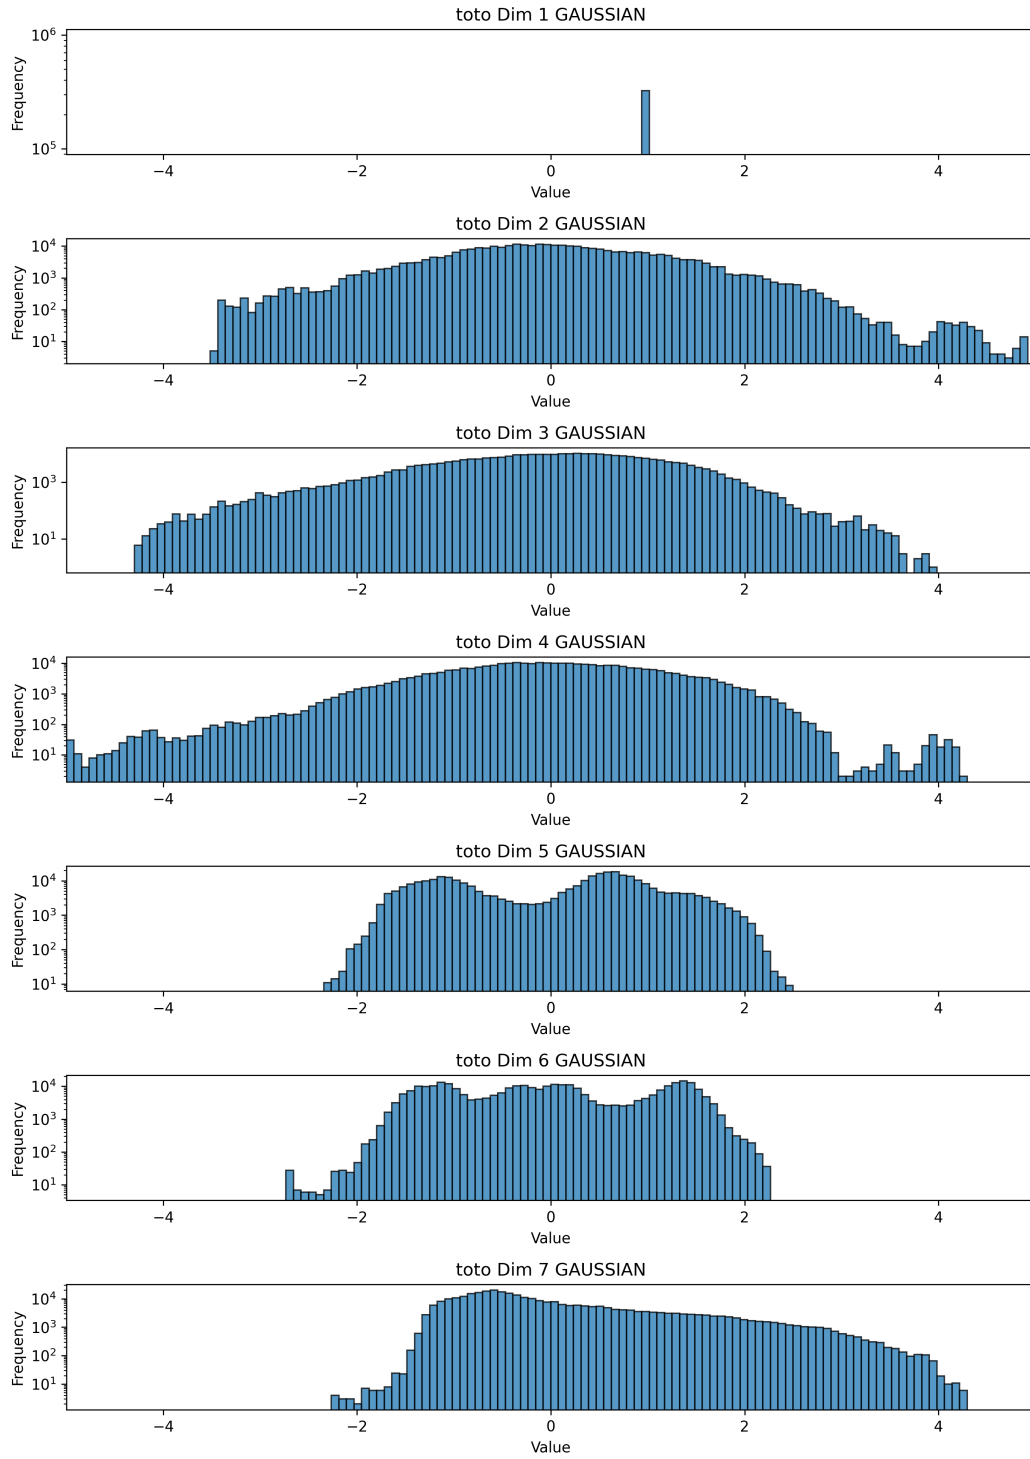

**Figure 7:** Action distributions for Toto.
